# Supplementary material for: Cross-modal autoencoder framework learns holistic representations of cardiovascular state
Source: PubMed Central journal article supplement (PMC10140057; doi:10.1038/s41467-023-38125-0), 2023-04-28
Supplement: 41467_2023_38125_MOESM1_ESM.pdf [file 41467_2023_38125_MOESM1_ESM.pdf]

Supplementary Materials:  
Cross-Modal Autoencoder Framework  
Learns Holistic Representations of Cardiovascular State

Adityanarayanan Radhakrishnan<sup>1#</sup>, Sam F. Friedman<sup>2#</sup>, Shaan Khurshid<sup>2,3</sup>,  
Kenney Ng<sup>4</sup>, Puneet Batra<sup>2</sup>, Steven A. Lubitz<sup>2,3\*</sup>, Anthony A. Philippakis<sup>2,\*</sup>,  
Caroline Uhler<sup>1,2,\*</sup>

<sup>1</sup>Massachusetts Institute of Technology, U.S.A.

<sup>2</sup>Broad Institute of MIT and Harvard, U.S.A.

<sup>3</sup>Massachusetts General Hospital, U.S.A.

<sup>4</sup>IBM T.J. Watson Research Center, U.S.A.

#Equal contribution.

\*To whom correspondence should be addressed; E-mail: [cuhler@mit.edu](mailto:cuhler@mit.edu); [aphilipp@broadinstitute.org](mailto:aphilipp@broadinstitute.org);  
[lubitz@broadinstitute.org](mailto:lubitz@broadinstitute.org).

**This PDF file includes:**

Supplementary Figures S1 to S17  
Supplementary Tables S1 to S3  
Supplementary Videos S1 to S5

## Supplementary Figures

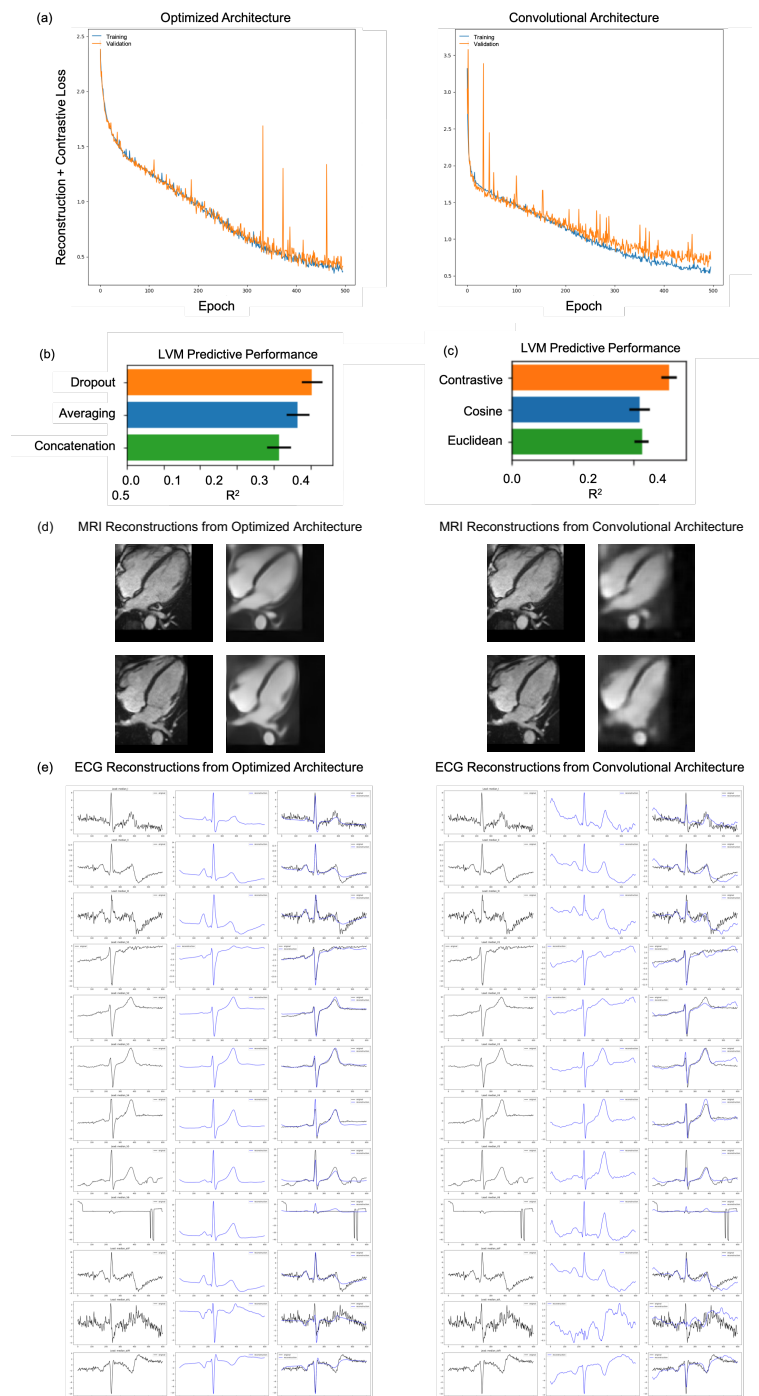

Supplementary Fig. S1: The impact of hyper-parameters, architecture, and loss functions on the performance of our autoencoder. (a) We visualize the training and validation loss across 500 epochs; the hyper-parameter optimized architecture produces lower loss than the standard convolutional network architecture from [1]. (b) Using modality dropout leads to improved performance on downstream LVM prediction over averaging or concatenating modality-specific embeddings during training (n=4708, bar shows mean value and black line indicates +/- one standard deviation). (c) Contrastive loss to pair modalities in the latent space leads to improved performance on LVM prediction over pairing samples by maximizing cosine similarity or minimizing Euclidean distance (n=4708, bar shows mean value and black line indicates +/- standard deviation). (d-e) We visualize the reconstructions of test MRI and ECG samples from the optimized architecture and standard convolutional architecture; reconstructions from the optimized architecture are of higher quality (lower loss) than those from the standard convolutional architecture.

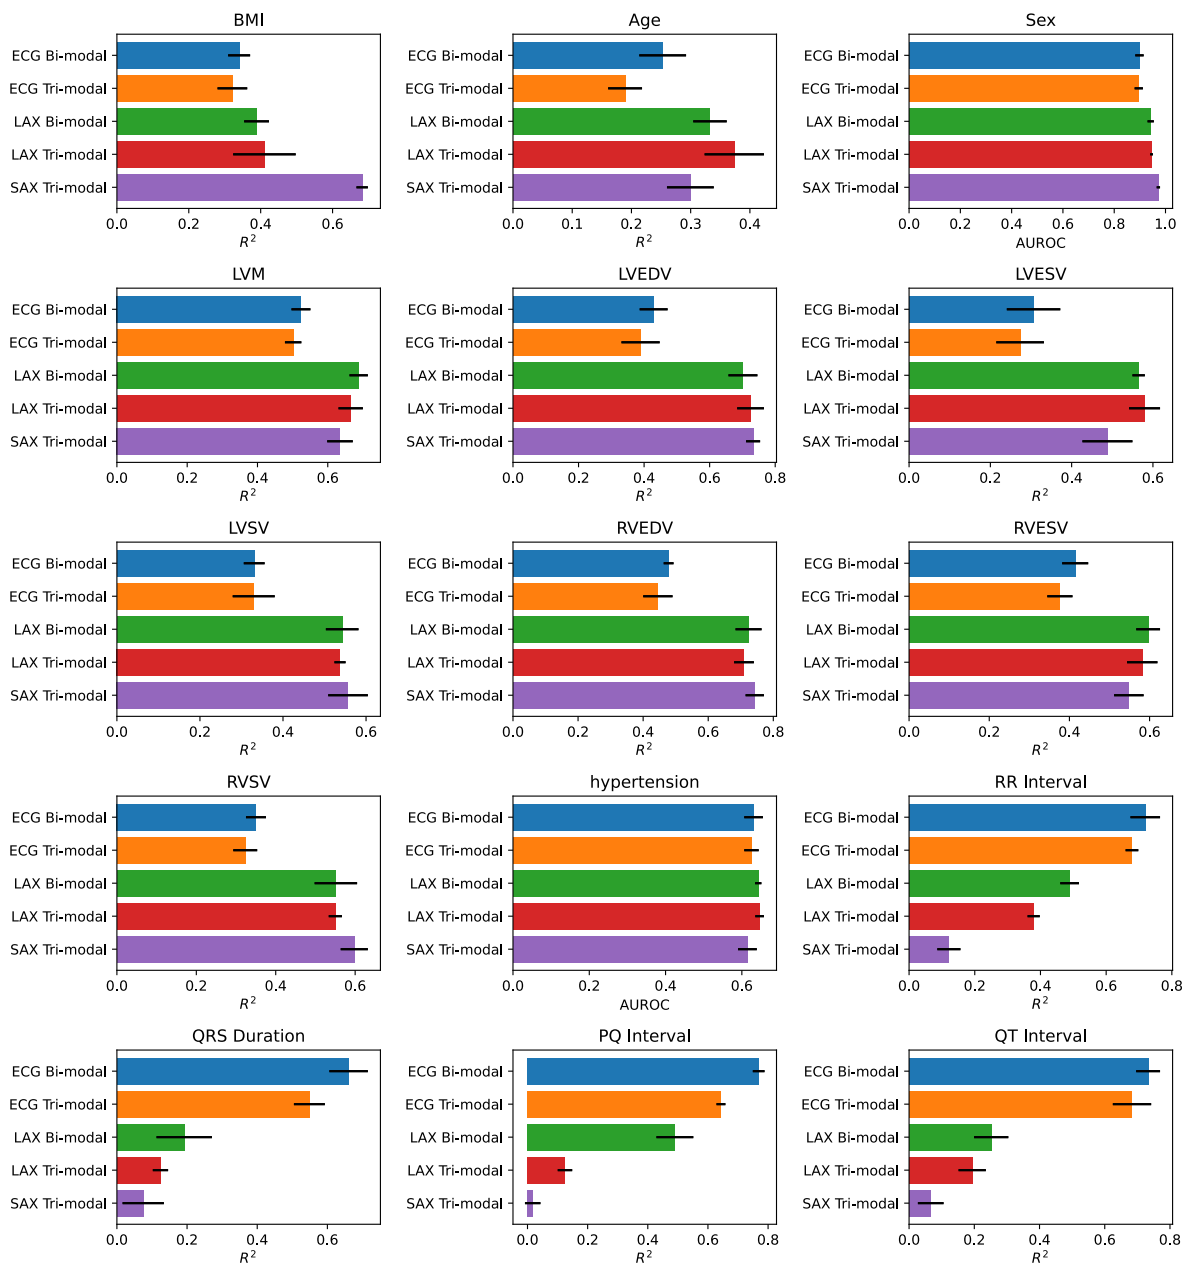

Supplementary Fig. S2: A comparison of phenotype prediction from bi-modal embeddings of ECGs and long axis views of cardiac MRIs (LAX) and tri-modal embeddings of ECGs, LAX, and short axis view of cardiac MRIs (SAX). We observe that predictive performance of general phenotypes such as BMI and sex improves when using tri-modal embeddings since SAX is informative about these phenotypes. On the other hand, prediction of ECG intervals (e.g., QT, RR, and PQ intervals) from tri-modal embeddings decreases since SAX contains little information about these phenotypes and may add noise to the prediction task. For BMI and Age,  $n = 4212$ . For Sex and hypertension,  $n = 4218$ . For LVM, LVEDV, LVESV, LSV, RVEDV, RVESV, and RSV,  $n = 4218$ . For RR Interval, QRS Duration, PQ Interval and QT Interval,  $n = 4120$ . Bars shows mean value and black line indicates  $\pm$  standard deviation.

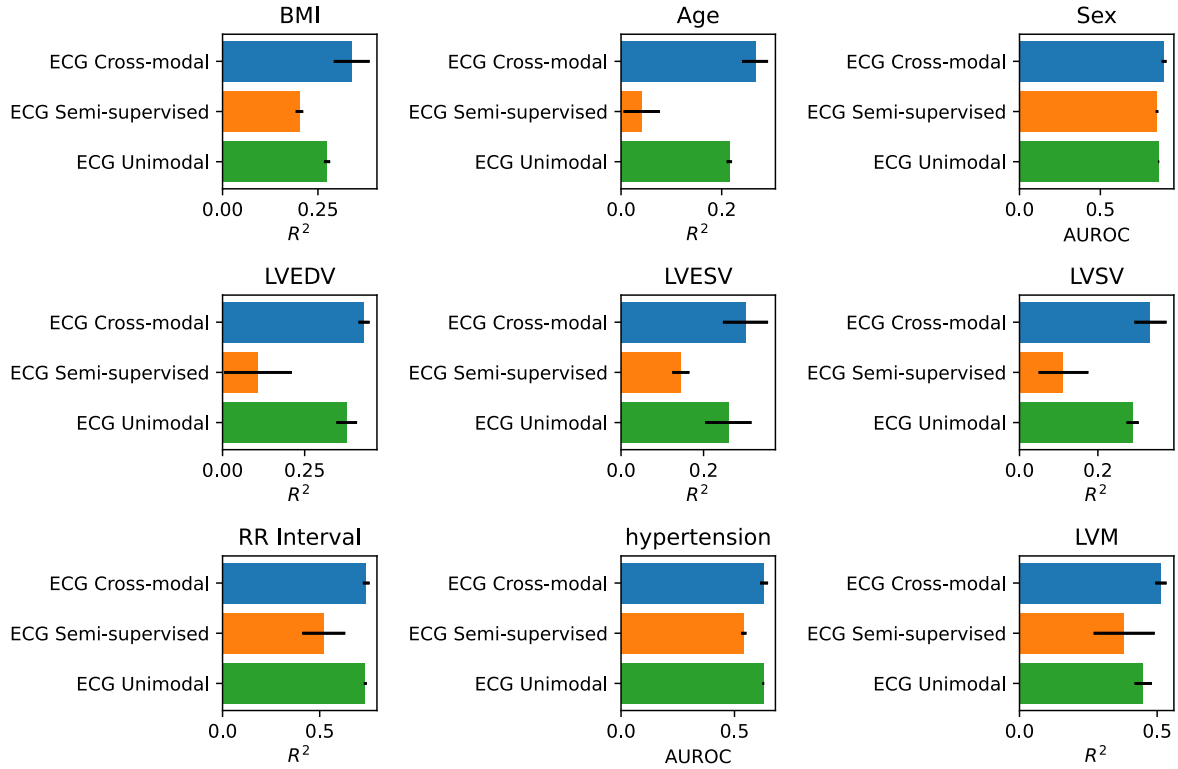

Supplementary Fig. S3: Prediction from cross-modal ECG embedding outperforms prediction from uni-modal ECG embedding and semi-supervised ECG embedding, i.e., the embedding obtained from an autoencoder that is trained to both reconstruct ECGs and predict phenotypes. For BMI and Age,  $n = 4212$ . For Sex and hypertension,  $n = 4218$ . For LVEDV, LVESV, LVSV, and LVM,  $n = 4218$ . For RR Interval,  $n = 4120$ . Bars shows mean value and black line indicates  $\pm$  standard deviation.

(a)  $R^2$  Values for ECG-Derived Phenotype Prediction from Cross-modal MRI Embeddings

| Model\Phenotype   | PQ Interval | QT Interval | QTC Interval | QRS Duration | RR Interval | Average |
|-------------------|-------------|-------------|--------------|--------------|-------------|---------|
| Kernel Regression | 0.51        | 0.26        | 0.19         | 0.25         | 0.49        | 0.34    |
| Linear Regression | 0.50        | 0.25        | 0.18         | 0.24         | 0.49        | 0.33    |

 $R^2$  Values for MRI-Derived Phenotype Prediction from Cross-modal ECG Embeddings

| Model\Phenotype   | LVM  | LVEDV | LVEF | LVESV | LVSV | RVEF | RVESV | RVSV | RVEDV | Average |
|-------------------|------|-------|------|-------|------|------|-------|------|-------|---------|
| Kernel Regression | 0.53 | 0.45  | 0.11 | 0.39  | 0.31 | 0.13 | 0.44  | 0.31 | 0.48  | 0.35    |
| Linear Regression | 0.51 | 0.43  | 0.11 | 0.36  | 0.30 | 0.14 | 0.43  | 0.30 | 0.47  | 0.34    |

(b)  $R^2$  Values for General Numerical Phenotype Prediction from Cross-modal ECG Embeddings

| Model\Phenotype   | BMI  | Age  | Average |
|-------------------|------|------|---------|
| Kernel Regression | 0.36 | 0.27 | 0.32    |
| Linear Regression | 0.35 | 0.24 | 0.29    |

 $R^2$  Values for General Numerical Phenotype Prediction from Cross-modal MRI Embeddings

| Model\Phenotype   | BMI  | Age  | Average |
|-------------------|------|------|---------|
| Kernel Regression | 0.48 | 0.42 | 0.45    |
| Linear Regression | 0.47 | 0.40 | 0.44    |

(c) AUROC Values for General Categorical Phenotype Prediction from Cross-modal ECG Embeddings

| Model\Phenotype     | Sex  | Hypercholesterolemia | Hypertension | Average |
|---------------------|------|----------------------|--------------|---------|
| Kernel Regression   | 0.96 | 0.64                 | 0.69         | 0.76    |
| Logistic Regression | 0.90 | 0.56                 | 0.63         | 0.70    |

AUROC Values for General Categorical Phenotype Prediction from Cross-modal MRI Embeddings

| Model\Phenotype     | Sex  | Hypercholesterolemia | Hypertension | Average |
|---------------------|------|----------------------|--------------|---------|
| Kernel Regression   | 0.99 | 0.66                 | 0.75         | 0.80    |
| Logistic Regression | 0.95 | 0.58                 | 0.66         | 0.73    |

Higher  $R^2$  and AUROC are better with a maximum value of 1.

Supplementary Fig. S4: Comparison of kernel, linear, and logistic regression models used for phenotype prediction from cross-modal ECG and MRI embeddings. Overall, the kernel regression models outperform linear and logistic regression models for the tasks considered in Fig. 2 of the main text. (a, b)  $R^2$ -values for kernel and linear regression used in the prediction of continuous-valued phenotypes considered in Fig. 2 of the main text. (c) Area under the Receiver Operating Curve (AUROC) for kernel and logistic regression used in the prediction of categorical phenotypes considered in Fig. 2 of the main text.

AUROC Values for Left Ventricular Hypertrophy Classification

|            | Cross-modal ECG      | Unimodal ECG  | Supervised ECG |
|------------|----------------------|---------------|----------------|
| LVH AUROC  | <b>0.756 ± 0.022</b> | 0.716 ± 0.012 | 0.692 ± 0.016  |
| LVSD AUROC | <b>0.572 ± 0.052</b> | 0.535 ± 0.028 | 0.558 ± 0.023  |

Supplementary Fig. S5: Logistic regression using cross-modal ECG embeddings leads to improved prediction of Left Ventricular Hypertrophy (LVH) and Left Ventricular Systolic Dysfunction (LVSD) over logistic regression from unimodal ECG embeddings and supervised learning from ECGs directly.

Prediction of MRI Derived Phenotypes from ECG (R<sup>2</sup>)

|         | Without LDL & CRP |          |            | With LDL & CRP |          |              |
|---------|-------------------|----------|------------|----------------|----------|--------------|
|         | Cross-modal       | Unimodal | Supervised | Cross-modal    | Unimodal | Supervised   |
| LVM     | <b>0.536</b>      | 0.475    | 0.439      | <b>0.536</b>   | 0.485    | 0.440        |
| LVEDV   | <b>0.451</b>      | 0.382    | 0.381      | 0.442          | 0.379    | <b>0.383</b> |
| LVEF    | <b>0.103</b>      | 0.080    | 0.049      | 0.098          | 0.085    | 0.044        |
| LVESV   | <b>0.380</b>      | 0.324    | 0.327      | 0.368          | 0.325    | 0.326        |
| LVSV    | <b>0.316</b>      | 0.246    | 0.231      | 0.315          | 0.244    | 0.233        |
| RVEF    | <b>0.129</b>      | 0.116    | 0.065      | 0.129          | 0.120    | 0.063        |
| RVESV   | 0.445             | 0.388    | 0.374      | <b>0.447</b>   | 0.399    | 0.380        |
| RVSV    | <b>0.320</b>      | 0.245    | 0.236      | <b>0.320</b>   | 0.248    | 0.239        |
| RVEDV   | <b>0.490</b>      | 0.409    | 0.407      | <b>0.490</b>   | 0.418    | 0.413        |
| Average | <b>0.352</b>      | 0.296    | 0.279      | 0.349          | 0.300    | 0.280        |

Prediction of General Phenotypes from ECG (R<sup>2</sup>)

|         | Without LDL & CRP |          |            | With LDL & CRP |          |            |
|---------|-------------------|----------|------------|----------------|----------|------------|
|         | Cross-modal       | Unimodal | Supervised | Cross-modal    | Unimodal | Supervised |
| BMI     | 0.362             | 0.320    | 0.192      | <b>0.461</b>   | 0.426    | 0.330      |
| Age     | 0.264             | 0.253    | 0.105      | <b>0.278</b>   | 0.253    | 0.117      |
| Average | 0.313             | 0.286    | 0.148      | <b>0.370</b>   | 0.340    | 0.224      |

Prediction of General Phenotypes from ECG (AUROC)

|                      | Without LDL & CRP |          |            | With LDL & CRP |          |            |
|----------------------|-------------------|----------|------------|----------------|----------|------------|
|                      | Cross-modal       | Unimodal | Supervised | Cross-modal    | Unimodal | Supervised |
| Sex                  | 0.961             | 0.937    | 0.911      | <b>0.962</b>   | 0.947    | 0.909      |
| Hypercholesterolemia | <b>0.635</b>      | 0.629    | 0.598      | 0.630          | 0.625    | 0.572      |
| Hypertension         | 0.696             | 0.713    | 0.684      | <b>0.706</b>   | 0.703    | 0.685      |
| Average              | 0.764             | 0.760    | 0.731      | <b>0.766</b>   | 0.758    | 0.722      |

Supplementary Fig. S6: Impact of two circulating biomarkers, namely low-density lipoprotein (LDL) and C-reactive protein (CRP), on the prediction of phenotypes from ECG. Generally, we observe that the inclusion of these biomarkers consistently increases the R<sup>2</sup>-value for predicting BMI and age across all models but does not generally increase prediction accuracy for MRI derived phenotypes or sex, hypercholesterolemia, and hypertension.

Prediction of MRI Derived Phenotypes from ECG ( $R^2$ )

|         | Without Sex |          |            | With Sex     |          |            |
|---------|-------------|----------|------------|--------------|----------|------------|
|         | Cross-modal | Unimodal | Supervised | Cross-modal  | Unimodal | Supervised |
| LVM     | 0.535       | 0.469    | 0.433      | <b>0.594</b> | 0.576    | 0.490      |
| LVEDV   | 0.452       | 0.387    | 0.391      | <b>0.506</b> | 0.495    | 0.415      |
| LVEF    | 0.109       | 0.095    | 0.049      | <b>0.123</b> | 0.112    | 0.052      |
| LVESV   | 0.388       | 0.344    | 0.352      | <b>0.437</b> | 0.428    | 0.369      |
| LVSV    | 0.311       | 0.240    | 0.220      | <b>0.345</b> | 0.319    | 0.241      |
| RVEF    | 0.131       | 0.111    | 0.061      | <b>0.146</b> | 0.140    | 0.073      |
| RVESV   | 0.438       | 0.382    | 0.370      | <b>0.493</b> | 0.489    | 0.404      |
| RVSV    | 0.312       | 0.242    | 0.222      | <b>0.356</b> | 0.337    | 0.246      |
| RVEDV   | 0.479       | 0.403    | 0.399      | <b>0.542</b> | 0.530    | 0.436      |
| Average | 0.351       | 0.297    | 0.277      | <b>0.394</b> | 0.381    | 0.303      |

Prediction of MRI Derived Phenotypes from ECG ( $R^2$ )

|         | Without BMI |          |            | With BMI     |          |            |
|---------|-------------|----------|------------|--------------|----------|------------|
|         | Cross-modal | Unimodal | Supervised | Cross-modal  | Unimodal | Supervised |
| LVM     | 0.535       | 0.469    | 0.433      | <b>0.566</b> | 0.513    | 0.475      |
| LVEDV   | 0.452       | 0.388    | 0.391      | <b>0.471</b> | 0.428    | 0.400      |
| LVEF    | 0.108       | 0.094    | 0.049      | <b>0.111</b> | 0.085    | 0.048      |
| LVESV   | 0.388       | 0.344    | 0.352      | <b>0.401</b> | 0.359    | 0.346      |
| LVSV    | 0.312       | 0.242    | 0.222      | <b>0.328</b> | 0.286    | 0.241      |
| RVEF    | 0.131       | 0.113    | 0.061      | <b>0.132</b> | 0.099    | 0.066      |
| RVESV   | 0.439       | 0.382    | 0.370      | <b>0.445</b> | 0.398    | 0.367      |
| RVSV    | 0.313       | 0.244    | 0.223      | <b>0.340</b> | 0.296    | 0.250      |
| RVEDV   | 0.480       | 0.403    | 0.400      | <b>0.499</b> | 0.446    | 0.409      |
| Average | 0.351       | 0.298    | 0.278      | <b>0.366</b> | 0.323    | 0.289      |

Supplementary Fig. S7: Impact of stratification by sex and BMI on the prediction of MRI-derived phenotypes from ECG. In general, we observe that such stratification increases the prediction accuracy as measured by  $R^2$ -values.



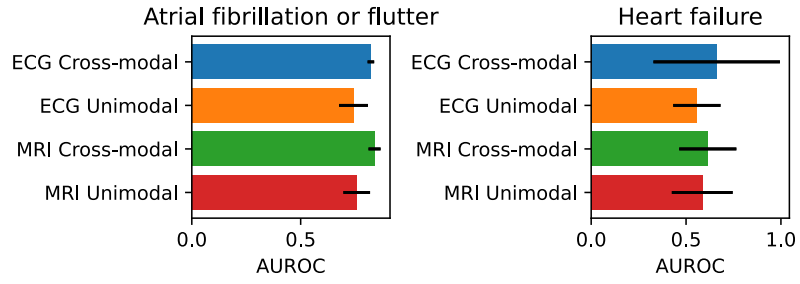

Supplementary Fig. S8: Cross-modal representation leads to improved performance of atrial fibrillation (AF) and heart failure (HF). Labels of AF and HF were provided by the UK Biobank. For these phenotypes,  $n = 4708$  and bars shows mean value and black line indicates  $\pm$  standard deviation.

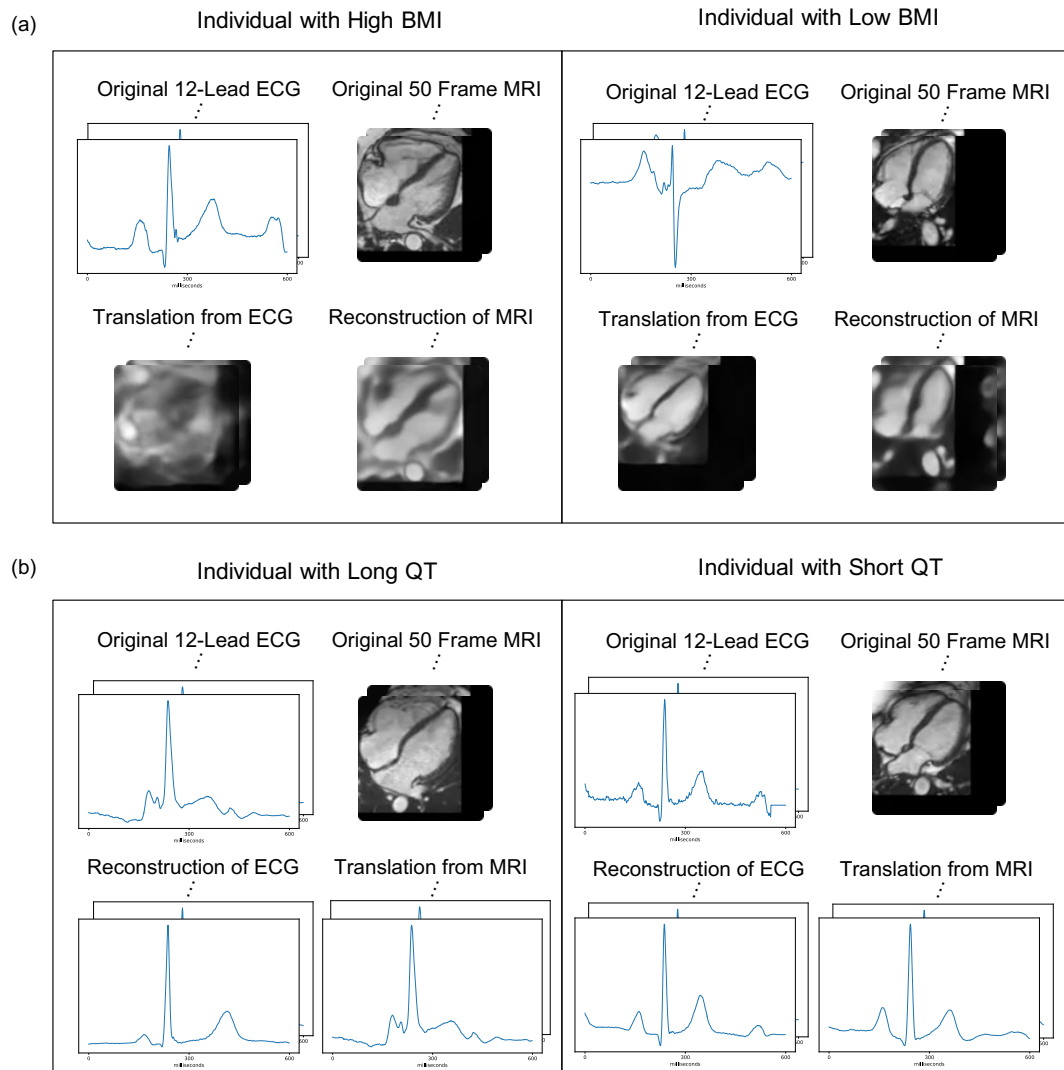

Supplementary Fig. S9: Additional examples of modality translation using cross-modal autoencoders. (a) Translation of ECG to MRI for individuals with high and low BMI. (b) Translation of MRI to ECG for individuals with long and short QT intervals.

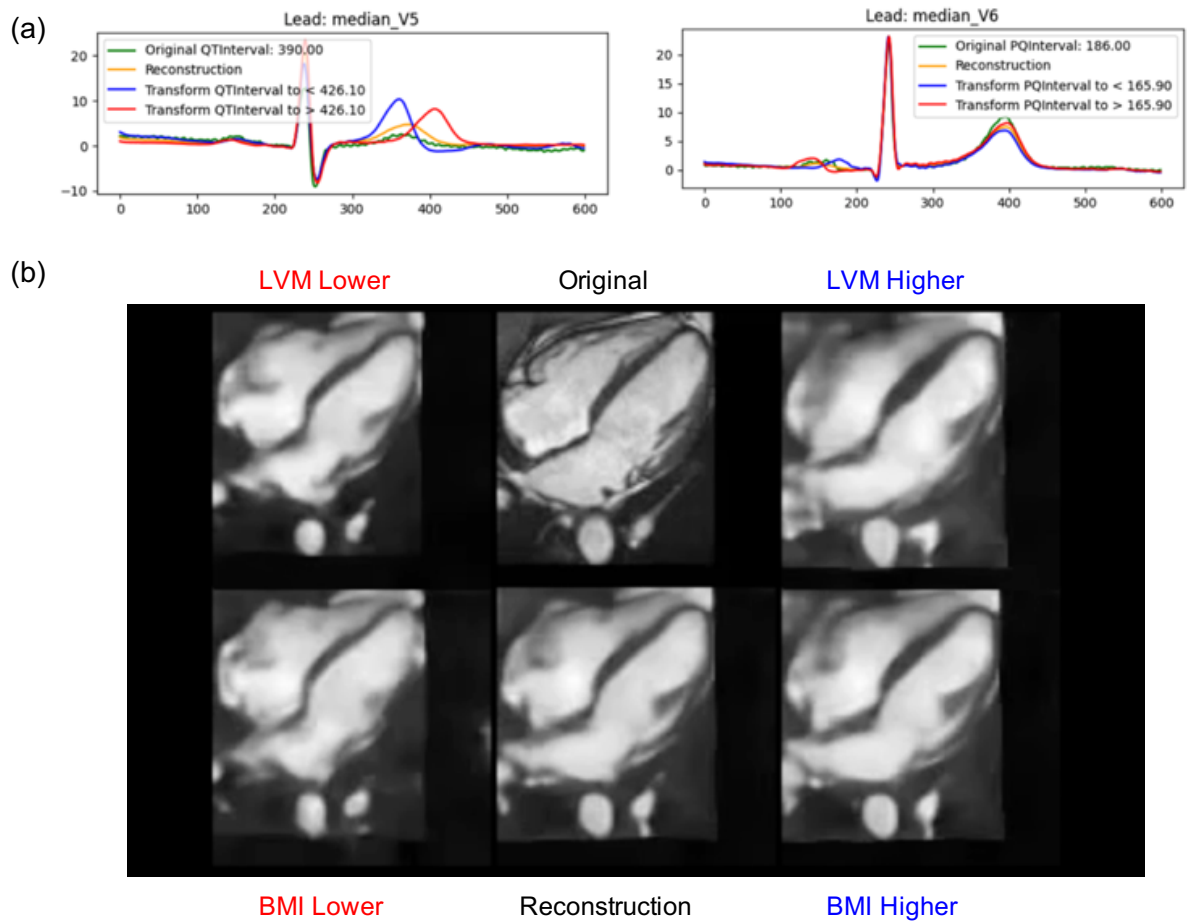

Supplementary Fig. S10: Translating cross-modal embeddings along a phenotype direction produces phenotype-specific impacts on ECGs and MRIs after decoding. (a) Translating cross-modal embeddings along the direction from short to long (or long to short) QT or PQ interval leads to corresponding increases (or decreases) of these intervals on the original ECGs. (b) Translating cross-modal embeddings along the direction from low to high (or high to low) LVM or BMI leads to corresponding increases (or decreases) of these phenotypes on the original MRI.

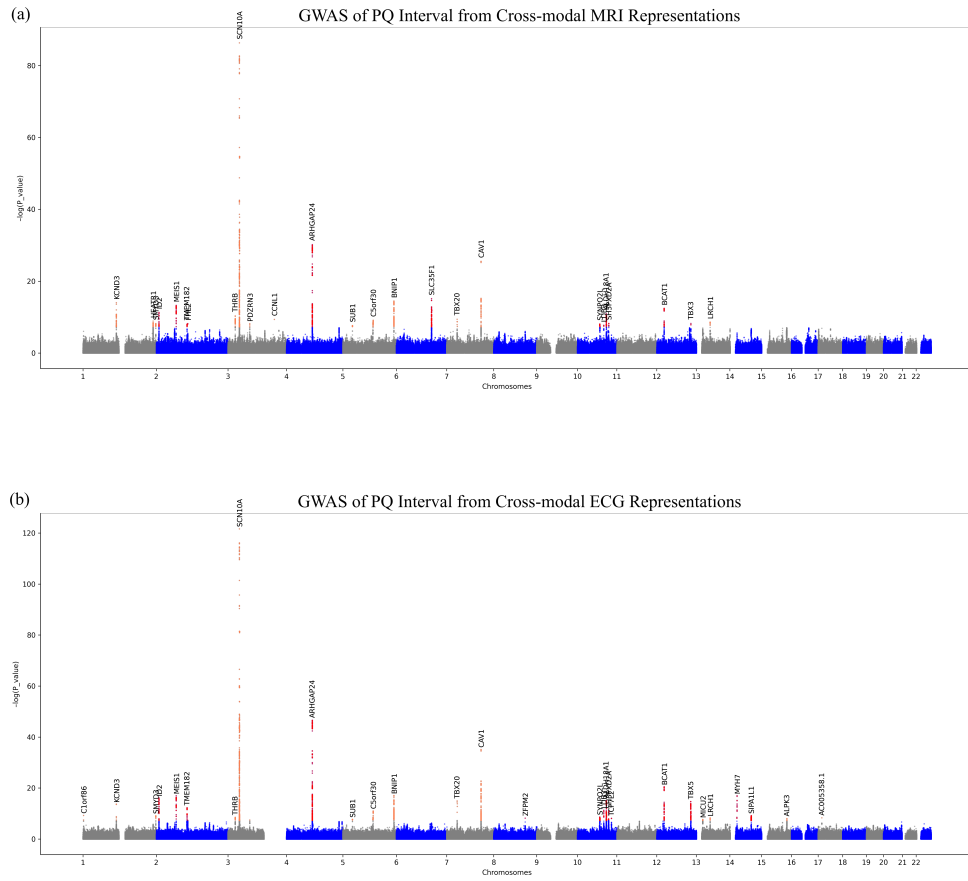

Supplementary Fig. S11: GWAS of PQ interval predicted from (a) MRI cross-modal representations and (b) ECG cross-modal representations identify genes associated with PQ interval duration, including SCN10A, KCND3, and CAV1.



| Model                              | Number of Principal Components of Ancestry | INLP $R^2$ Threshold | Remaining Latent Dimensionality | Number of Lead SNPs Identified | GC $\lambda$ |
|------------------------------------|--------------------------------------------|----------------------|---------------------------------|--------------------------------|--------------|
| Cross-modal ECG                    | 30                                         | 0.001                | 38                              | 48                             | 1.083        |
| Cross-modal ECG                    | 10                                         | 0.002                | 111                             | 91                             | 1.172        |
| Cross-modal ECG                    | 5                                          | 0.002                | 131                             | 723                            | 1.333        |
| Cross-modal ECG                    | 5                                          | 0.01                 | 165                             | 2720                           | 2.72         |
| Unimodal ECG                       | 40                                         | 0.001                | 13                              | 50                             | 1.151        |
| Unimodal ECG                       | 30                                         | 0.001                | 49                              | 97                             | 1.228        |
| Unimodal ECG                       | 20                                         | 0.001                | 85                              | 304                            | 1.338        |
| Cross-modal MRI (256 latent dims.) | 10                                         | 0.002                | 136                             | 26                             | 1.086        |
| Cross-modal MRI (512 latent dims.) | 30                                         | 0.001                | 202                             | 73                             | 0.984        |
| Unimodal MRI                       | 10                                         | 0.002                | 167                             | 6                              | 1.0          |

(a)

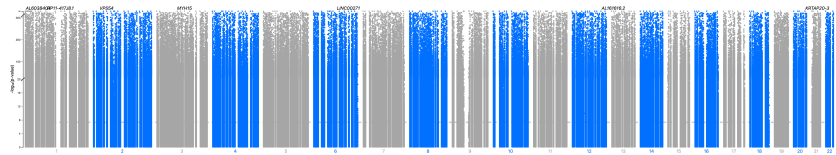

(b)

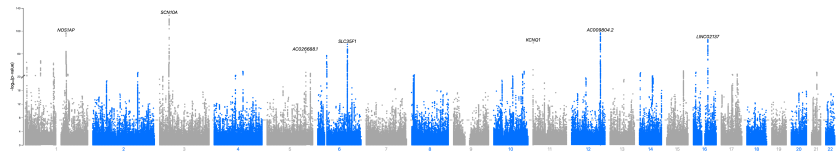

(c)

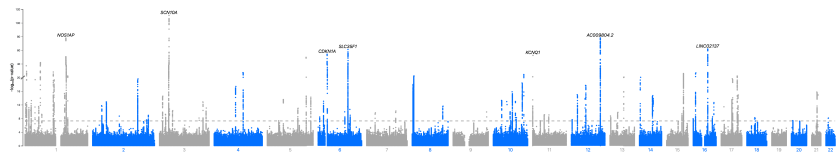

(d)

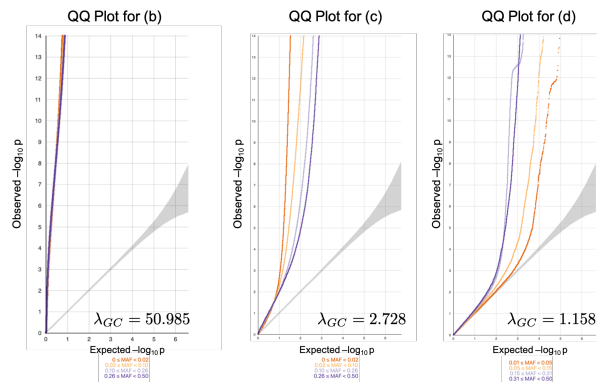

(e)

Supplementary Fig. S13: Impact of varying the number of principal components of ancestry and the threshold for iterative nullspace projection (INLP) on the number of lead SNPs recovered by unsupervised GWAS for cross-modal and unimodal ECG embeddings. (a) Using too few principal components (PCs) of ancestry or using too large of an  $R^2$  threshold yield unsupervised GWAS that are inflated, as is indicated by the  $\lambda_{GC}$  values. (b) Manhattan plot for uncorrected GWAS, which is highly inflated. (c) Manhattan plot for GWAS corrected with 5 PCs and an INLP threshold of 0.01, which is also inflated. (d) Manhattan plot for corrected GWAS with 20 PCs and an INLP threshold of 0.0015, which is no longer inflated. (e) Corresponding QQ plots for the Manhattan plots in (b-d). The  $\lambda_{GC}$  values are large for uncorrected unsupervised GWAS, and decrease to reasonable values after correction.

(a)

Comparison of Lead SNPs Across Embeddings/Phenotypes

|                       | PQ Interval | QRS Duration | QT Interval | QTC Interval | RR Interval |
|-----------------------|-------------|--------------|-------------|--------------|-------------|
| Cross-modal ECG + MRI | 0.43        | <b>0.71</b>  | <b>0.47</b> | <b>0.75</b>  | 0.39        |
| Cross-modal ECG       | <b>0.53</b> | 0.64         | <b>0.47</b> | <b>0.75</b>  | 0.44        |
| Cross-modal MRI       | 0.23        | 0.32         | 0.20        | 0.19         | 0.33        |
| PQ Interval           | 1.00        | 0.29         | 0.20        | 0.25         | 0.33        |
| QRS Duration          | 0.17        | 1.00         | 0.03        | 0.25         | 0.06        |
| QT Interval           | 0.13        | 0.04         | 1.00        | 0.44         | <b>0.78</b> |
| QTC Interval          | 0.09        | 0.14         | 0.23        | 1.00         | 0.17        |
| RR Interval           | 0.13        | 0.04         | <b>0.47</b> | 0.19         | 1.00        |
| Verweij et al. 2020.  | 0.45        | 0.54         | <b>0.47</b> | 0.62         | 0.44        |

(b)

Number of Lead SNPs from GWAS

| Cross-modal ECG + MRI | Cross-modal ECG | Cross-modal MRI | PQ Interval | QRS Duration | QT Interval | QTC Interval | RR Interval | Verweij et al. 2020. |
|-----------------------|-----------------|-----------------|-------------|--------------|-------------|--------------|-------------|----------------------|
| 93                    | 86              | 33              | 22          | 23           | 18          | 24           | 11          | 72                   |

Supplementary Fig. S14: (a) Unsupervised GWAS of cross-modal representations identifies several lead SNPs associated with the heart and includes those found from GWAS on ECG derived phenotypes and from [2]. Entry  $(i, j)$  of the table represents the percentage of lead SNPs identified via GWAS of the phenotype in column  $j$  that also arise when performing GWAS of the embedding/phenotype in row  $i$ . We observe that lead SNPs identified by unsupervised GWAS of cross-modal representations include several of those from GWAS of PQ interval, QRS duration, QT interval, QTC interval, and RR interval. On the other hand, GWAS based on specific phenotypes (e.g. PQ interval, QRS duration, etc.) identifies lead SNPs that do not overlap much with those from GWAS of other ECG derived phenotypes. Our single unsupervised GWAS of cross-modal ECG representations identifies several of the same lead SNPs as those identified from 500 GWAS of ECG values from [2] upon Bonferroni correction. (b) A count of the number of lead SNPs identified by our unsupervised GWAS compared to GWAS on labelled ECG phenotypes. Our method recovers many more significant SNPs and includes those found via traditional GWAS approaches.

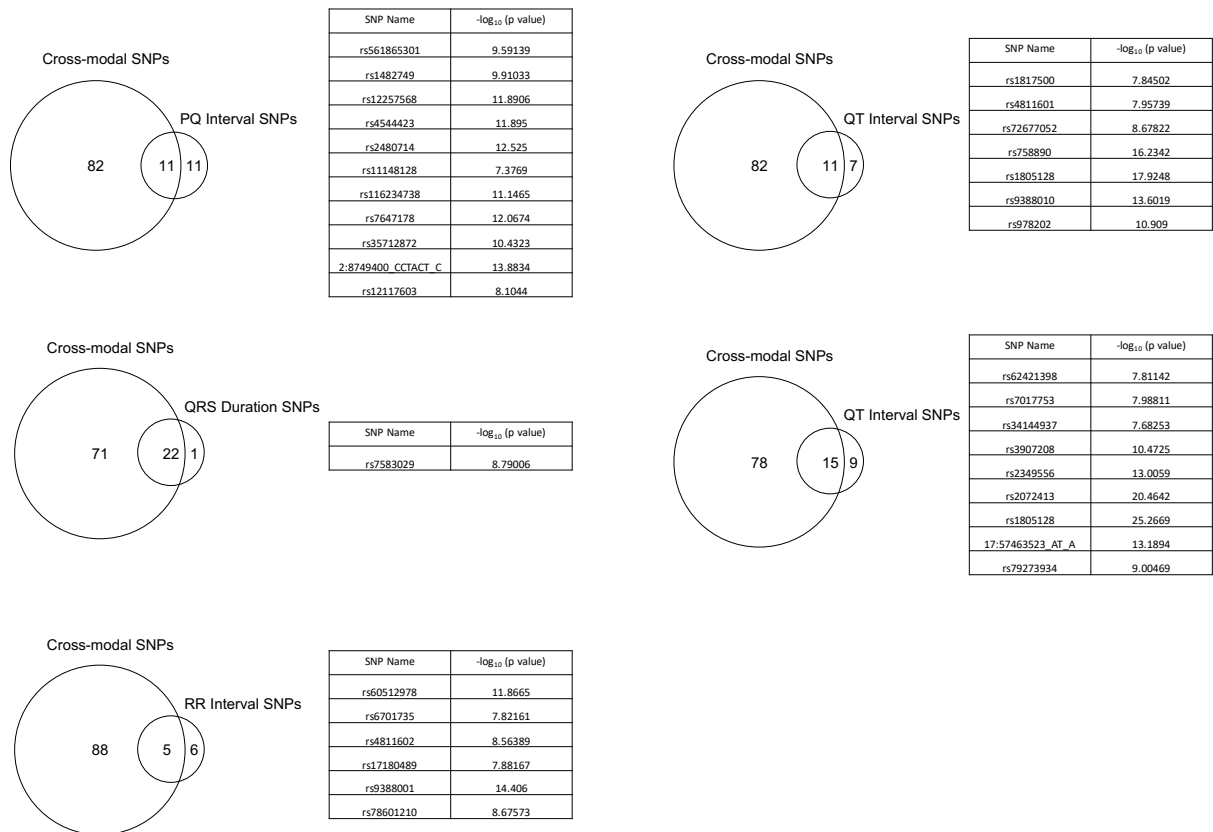

Supplementary Fig. S15: Venn diagrams illustrating the difference in SNPs found by the cross-modal unsupervised GWAS and SNPs found by the supervised GWAS on ECG-derived phenotypes. Overall, we observe that the SNPs not found by our method are near the significance cutoff of  $5 \times 10^{-8}$ . Reported p-values are given by two-sided t-tests.



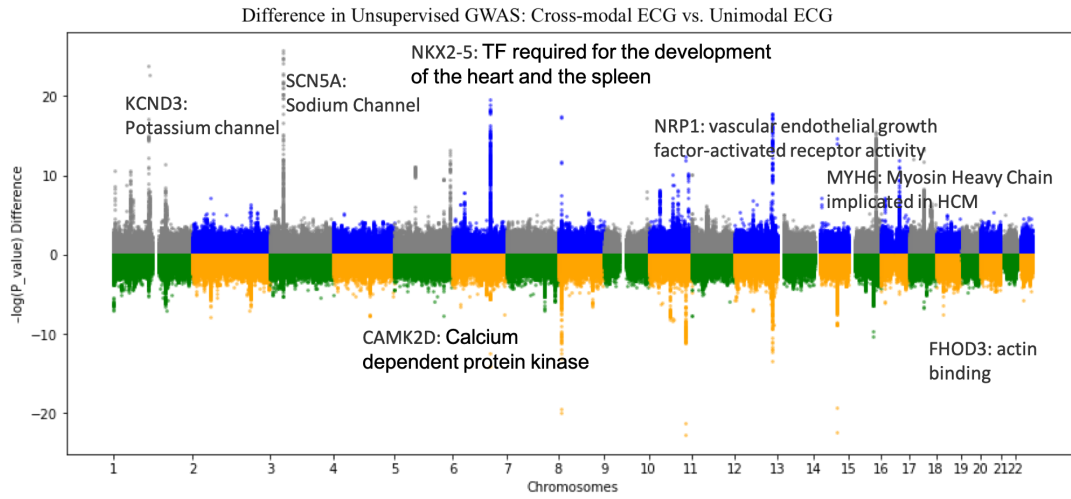

(a)

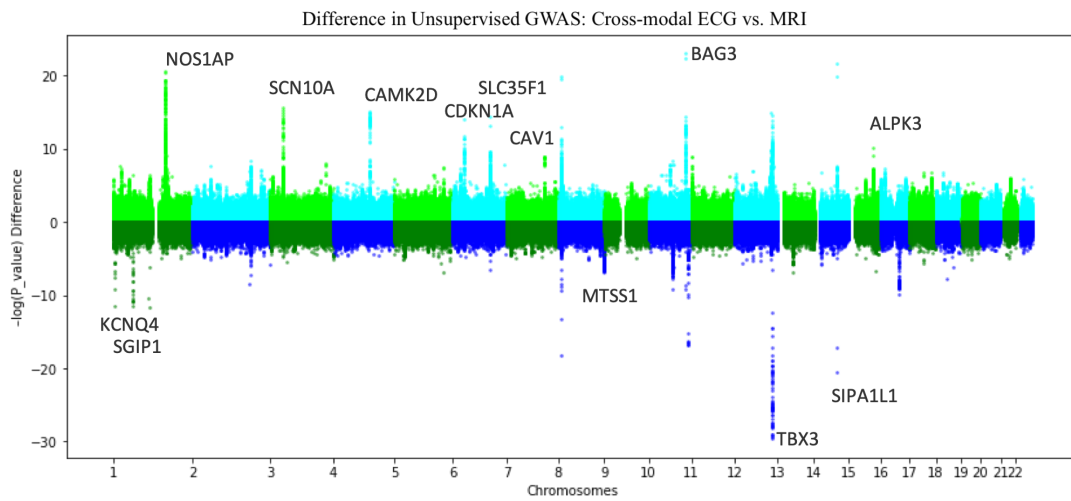

(b)

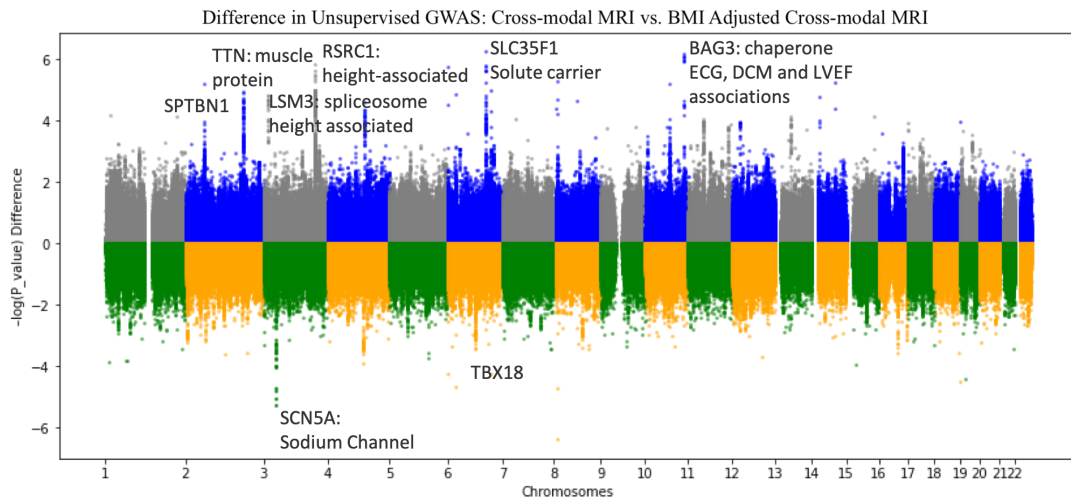

(c)

Supplementary Fig. S16: A visualization of the differences between Manhattan plots resulting from unsupervised GWAS. (a) Cross-modal ECG representations show enriched signals for genes associated with vasculature development, the heart muscle protein, myosin, and ion channels (KCND3, and SCN5A) as compared to unimodal ECG representations. (b) Difference between unsupervised GWAS of cross-modal ECG representations and cross-modal MRI representations shows stronger signals for the cross-modal ECG. (c) BMI-adjustment increases strength of the sodium ion channel SCN5A but also shows reduced significance at sites associated with height.

(a)

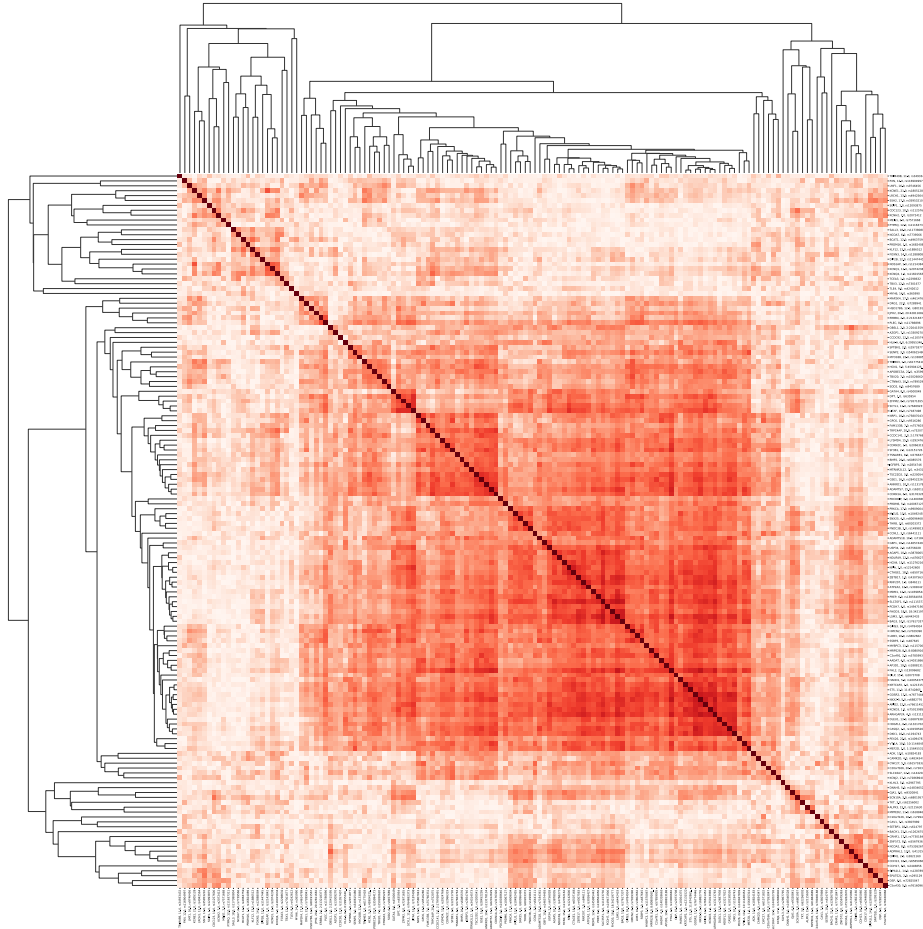

(b)

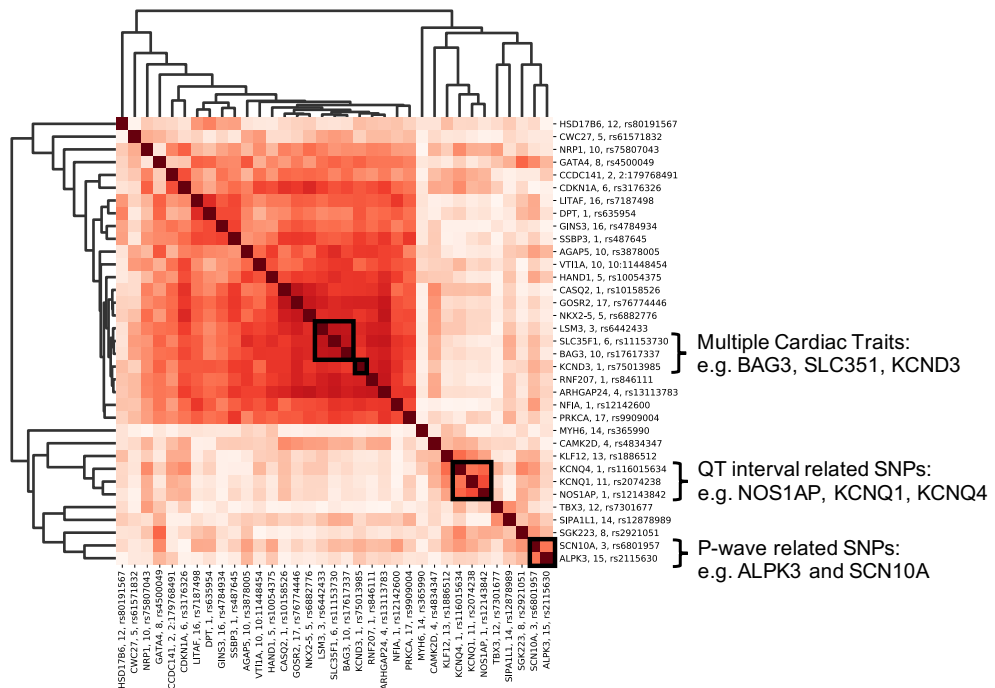

Supplementary Fig. S17: (a) Hierarchical clustering of SNPs by signature, i.e., the vector pointing from the mean embedding of homozygous reference samples to the mean embedding of heterozygous and homozygous alternate samples. Darker colors indicate highly correlated SNP signatures. Several clusters arise including those corresponding to genes associated with the QT interval, genes related to the P-wave, and genes with effects on multiple cardiac traits. (b) Hierarchical clustering on a smaller subset of lead SNPs confirms the robustness of the identified clusters by showing that the SNPs fall into the same phenotypic clusters as in (a).
