# Supplementary material for: Cross-modal autoencoder framework learns holistic representations of cardiovascular state
Source: PubMed Central journal article supplement (PMC10140057; doi:10.1038/s41467-023-38125-0), 2023-04-28
Supplement: 41467_2023_38125_MOESM4_ESM.pdf [file 41467_2023_38125_MOESM4_ESM.pdf]

## Description of Additional Supplementary Files

**Supplementary Video S1:** Cardiac MRI videos after decreasing or increasing age by moving in cross-modal latent space.

**Supplementary Video S2:** Cardiac MRI videos after decreasing or increasing BMI by moving in cross-modal latent space.

**Supplementary Video S3:** Cardiac MRI videos after decreasing or increasing LVM by moving in cross-modal latent space.

**Supplementary Video S4:** Cardiac MRI videos after decreasing or increasing RVEDV by moving in cross-modal latent space.

**Supplementary Video S5:** Cardiac MRI videos after moving in directions corresponding to female or male labeled points in cross-modal latent space.
